# Supplementary material for: Is Decreased Xylem Sap Surface Tension Associated With Embolism and Loss of Xylem Hydraulic Conductivity in Pathogen-Infected Norway Spruce Saplings?
Source: Front Plant Sci. 2020 Jul 16;11:1090. doi: 10.3389/fpls.2020.01090 (PMC7378778; doi:10.3389/fpls.2020.01090)
Supplement: Supplementary file 2 [file DataSheet_2.xlsx]

## Sheet: Hydraulic measurements
Hydraulic measurements data including stem hydraulic conductivity (Kstem) (kg m-1 s-1 MPa-1), saturated stem hydraulic conductivity (Kstem,saturated), xylem sap surface tension (σxylem) (N m-1), stem relative water content (RWCstem), stem water potential (Ψstem) (MPa), saturated stem water content and percent loss of conductivity (PLC) (%) used in the study of E. polonica infected Picea abies sap…
date	clone / treatment	tree_nr	K_stem	K_stem_saturated	σ_xylem	RWC_stem	Ψ_stem	Saturated stem water content	PLC
	infected
2016-06-29	64	3	0.299547	NA	0.0664092	NA	NA	NA	NA
2016-06-30	64	1	0.307918	NA	0.0685721	0.820769	-2.1	1.21953	NA
2016-07-01	64	12	0.156377	NA	0.0635467	0.751919	-1.7	1.14817	NA
2016-07-06	64	4	0.0844813	NA	0.05084	0.665707	-1.75	1.19697	NA
2016-07-08	64	8	0.0987709	0.0529903	0.0594364	0.643297	-1.5	1.17027	NA
2016-07-12	64	21	0.0335703	0.0606241	0.0505658	0.627959	-1.85	0.972662	44.6
2016-07-21	64	2	0.177869	0.235822	0.0671326	0.657706	-1.5	1.27107	24.6
2016-07-21	64	10	0.18305	0.271583	0.0554165	0.703161	-1.9	1.20886	32.6
2016-09-06	64	5	0.241065	0.263171	0.0598044	0.336413	-1.2	0.84365	8.4
2016-09-06	64	9	0.274483	0.316599	0.0584445	0.647806	-1.35	1.20896	13.3
2016-09-08	64	13	NA	NA	NA	NA	NA	1.24029	NA
2016-07-06	1510	13	0.0919271	0.136442	0.0519694	0.71501	-1.8	1.34052	32.6
2016-07-07	1510	4	0.102467	NA	0.0482689	0.639402	-1.5	0.989668	NA
2016-07-08	1510	8	0.297246	0.306732	0.0644688	0.818175	-1.69	1.52081	3.1
2016-07-13	1510	10	0.113879	0.0986402	0.055084	0.718188	-1.55	1.32749	NA
2016-07-14	1510	2	0.210732	0.19665	0.068318	0.716382	-1.5	1.23559	NA
2016-07-26	1510	6	0.15893	0.163787	0.0581833	NA	-1.35	NA	3
2016-07-26	1510	7	0.148242	0.174601	0.0645372	NA	-1.65	NA	15.1
2016-09-13	1510	9	0.134236	0.161007	0.0669994	0.710961	-1.6	1.18991	16.6
2016-09-14	1510	11	0.213295	0.232494	0.0690309	0.742372	-1.5	1.46498	8.3
2016-09-15	1510	5	0.225968	0.252911	0.0682135	0.696576	-1.15	1.02759	10.7
	wounded controls
2016-06-29	64	19	0.159192	NA	0.0616974	NA	NA	NA	NA
2016-06-30	64	18	0.667046	NA	0.0703233	0.878259	-1.65	1.45722	NA
2016-07-01	64	24	0.366269	NA	0.0707327	0.805373	-1.8	1.46388	NA
2016-07-06	64	14	0.498282	NA	0.065647	0.81156	-1.55	1.7254	NA
2016-07-08	64	7	0.407806	NA	0.0687668	0.798436	-1.59	1.59394	NA
2016-07-12	64	15	0.642815	0.617851	0.0522245	NA	-1.55	NA	NA
2016-07-21	64	16	0.699984	0.690085	0.0647304	0.795484	-1.45	1.66012	NA
2016-07-21	64	17	0.462588	0.613174	0.0688641	0.829015	-1.5	1.58492	24.6
2016-09-06	64	11	0.526741	0.56877	0.0702677	NA	-1.5	1.60166	7.4
2016-09-06	64	20	0.804322	0.891822	0.0672877	0.822664	-1.3	1.82621	9.8
2016-09-08	64	6	0.671358	0.76211	0.0675682	0.798256	-1.75	1.7128	11.9
2016-07-06	1510	18	0.431136	0.436696	0.0608898	0.823617	-1.45	1.70773	1.3
2016-07-07	1510	16	0.580184	NA	0.0639156	0.826152	-1.15	1.68995	NA
2016-07-08	1510	1	0.534325	0.32084	0.0682858	0.843138	-1.17	1.54463	NA
2016-07-13	1510	17	0.416013	0.425212	0.0659952	0.791715	-1.55	1.48331	2.2
2016-07-14	1510	15	0.427068	NA	0.0625683	0.8094	-1.45	1.50746	NA
2016-07-26	1510	3	0.525672	0.513188	0.0680696	NA	-1.4	NA	NA
2016-07-26	1510	19	0.466211	0.528306	0.0641154	0.890343	-1.6	NA	11.8
2016-09-13	1510	14	NA	NA	NA	NA	NA	1.04825	NA
2016-09-14	1510	20	0.249431	0.278468	0.0656624	0.874305	-1.35	1.57883	10.4
2016-09-15	1510	12	0.465687	0.493732	0.0719423	0.78001	-1.25	1.60385	5.7
	intact controls
2016-07-15	64	22	0.832689	0.818952	0.0660504	0.854861	NA	1.50005	NA
2016-09-09	64	23	0.656044	0.79473	0.0676654	0.831974	-1.45	1.76873	17.4506
2016-07-22	1510	21	0.608852	0.653167	0.0653243	0.853689	-1.4	1.52056	6.78455
2016-09-14	1510	23	0.49645	0.566488	0.0620811	0.777125	NA	1.54336	12.3635

## Sheet: Physiological measurements
Monitored physiological measurements including the sapwood area-specific whole tree transpiration rate, stem water potential above the inoculation point and canopy conductance. The canopy conductance is calculated as the sapwood area-specific transpiration rate divided by vapor pressure deficit.
																						VPD, MPa
																						0.001814	0.001953	0.001097	0.00163	0.001723	0.002076	0.001495	0.001052
clone	treatment	tree nr		transpiration rate, m3 m-2 s-1									water potential, MPa									canopy conductance, mmol m-2 s-1 MPa-1
			date	2016-06-22	2016-06-28	2016-07-05	2016-07-10	2016-07-20	2016-07-25	2016-08-10	2016-08-24		2016-06-22	2016-06-28	2016-07-05	2016-07-10	2016-07-20	2016-07-25	2016-08-10	2016-08-24		2016-06-22	2016-06-28	2016-07-05	2016-07-10	2016-07-20	2016-07-25	2016-08-10	2016-08-24
64	infected	1		NA	4.87222e-06	NA	NA	NA	NA	NA	NA		NA	NA	NA	NA	NA	NA	NA	NA		NA	0.138462	NA	NA	NA	NA	NA	NA
64	infected	2		1.3025e-05	1.10028e-05	6.63611e-06	8.64444e-06	8.38333e-06	NA	NA	NA		NA	-1.7	-1.65	-1.7	-1.7	NA	NA	NA		0.398546	0.312739	0.335831	0.294416	0.270084	NA	NA	NA
64	infected	3		NA	6.73056e-06	NA	NA	1.63056e-06	2.79722e-06	NA	9.77778e-07		NA	-1.8	NA	NA	NA	NA	NA	NA		NA	0.191307	NA	NA	0.0525683	0.0747937	NA	0.0516589
64	infected	4		NA	1.14222e-05	6.52778e-06	NA	NA	NA	NA	NA		NA	-1.7	-1.6	NA	NA	NA	NA	NA		NA	0.324642	0.330265	NA	NA	NA	NA	NA
64	infected	5		NA	1.46722e-05	9.43056e-06	1.02167e-05	1.46722e-05	2.38028e-05	1.57194e-05	1.38333e-05		NA	-1.9	-1.1	-1.15	-1.75	-1.2	-1.65	-1.1		NA	0.416985	0.477233	0.347946	0.472648	0.636453	0.58364	0.729882
64	infected	8		NA	1.62417e-05	8.82222e-06	NA	5.11389e-06	8.25e-06	NA	4.33056e-06		NA	NA	-1.3	NA	NA	NA	NA	NA		NA	0.461586	0.446392	NA	0.164712	0.220565	NA	0.228511
64	infected	9		NA	1.11278e-05	NA	NA	1.10083e-05	2.53667e-05	NA	1.44361e-05		NA	NA	NA	NA	NA	NA	NA	-1.3		NA	0.316272	NA	NA	0.354615	0.678238	NA	0.761705
64	infected	10		NA	7.51667e-06	NA	NA	5.30556e-06	NA	NA	NA		NA	NA	NA	NA	-1.85	NA	NA	NA		NA	0.213612	NA	NA	0.170913	NA	NA	NA
64	infected	12		3.08778e-05	2.82444e-05	NA	NA	NA	NA	NA	NA		-1.6	NA	NA	NA	NA	NA	NA	NA		0.944829	0.802789	NA	NA	NA	NA	NA	NA
64	infected	13		5.24444e-06	7.95556e-06	4.62222e-06	3.97778e-06	7.54722e-06	1.22389e-05	1.285e-05	2.44722e-06		NA	NA	-1.6	-1.95	-2.6	-1.25	-1.25	-1.2		0.160493	0.22609	0.233938	0.135446	0.243129	0.327223	0.47711	0.129147
64	infected	21		NA	5.61389e-06	NA	4.41111e-06	NA	NA	NA	NA		NA	-1.85	NA	-1.8	NA	NA	NA	NA		NA	0.159561	NA	0.150212	NA	NA	NA	NA
1510	infected	2		2.21694e-05	2.19556e-05	NA	1.08278e-05	NA	NA	NA	NA		NA	NA	NA	-1.2	NA	NA	NA	NA		0.678384	0.623996	NA	0.368703	NA	NA	NA	NA
1510	infected	4		NA	1.55028e-05	9.51944e-06	NA	NA	3.49722e-06	NA	1.46944e-06		NA	NA	-1.3	NA	NA	NA	NA	NA		NA	0.440586	0.481637	NA	NA	0.0934922	NA	0.0774883
1510	infected	5		NA	2.09278e-05	1.48806e-05	1.77889e-05	1.91833e-05	2.87e-05	2.1975e-05	1.59056e-05		NA	NA	-1.05	-1.35	-1.45	-1.35	-1.25	-0.95		NA	0.594812	0.753031	0.605778	0.618028	0.76741	0.815887	0.839227
1510	infected	6		NA	1.22472e-05	NA	9.06111e-06	9.30833e-06	1.51167e-05	NA	NA		NA	NA	NA	-1.1	-1.55	-1.2	NA	NA		NA	0.348072	NA	0.308614	0.299847	0.404166	NA	NA
1510	infected	7		NA	1.99111e-05	NA	NA	1.23139e-05	2.56e-05	NA	NA		NA	NA	NA	NA	-1.5	-1.45	NA	NA		NA	0.565908	NA	NA	0.396686	0.684487	NA	NA
1510	infected	8		1.84e-05	1.40083e-05	9.21667e-06	NA	1.81944e-06	NA	NA	NA		NA	NA	-0.95	NA	NA	NA	NA	NA		0.56308	0.398163	0.466432	NA	0.0586121	NA	NA	NA
1510	infected	9		NA	NA	NA	NA	NA	5.38889e-06	NA	1.88611e-06		NA	NA	NA	NA	NA	NA	NA	-1.25		NA	NA	NA	NA	NA	0.144103	NA	0.0995294
1510	infected	10		NA	1.51972e-05	9.825e-06	NA	NA	NA	NA	NA		NA	NA	-1.1	NA	NA	NA	NA	NA		NA	0.431936	0.497118	NA	NA	NA	NA	NA
1510	infected	11		2.11389e-05	2.045e-05	1.0425e-05	1.12778e-05	1.56389e-05	2.16528e-05	1.80444e-05	1.22694e-05		NA	NA	-1.1	-1.55	-1.5	-1.35	-1.35	-1.05		0.646831	0.581257	0.527554	0.384065	0.503824	0.578984	0.669995	0.647449
1510	infected	13		NA	1.81917e-05	NA	NA	NA	NA	NA	NA		NA	NA	NA	NA	NA	NA	NA	NA		NA	0.517014	NA	NA	NA	NA	NA	NA
64	wounded control	6		1.25889e-05	1.06056e-05	6.8e-06	7.95556e-06	1.04028e-05	1.50361e-05	1.04028e-05	8.32222e-06		-1.7	NA	-1.4	-1.5	-1.5	-1.45	-1.7	-1.5		0.385184	0.301454	0.344026	0.270892	0.335123	0.402016	0.386232	0.4391
64	wounded control	7		NA	1.29056e-05	1.11611e-05	NA	4.18611e-06	7.175e-06	NA	1.675e-06		NA	NA	-1.35	NA	NA	NA	NA	NA		NA	0.366801	0.564773	NA	0.134842	0.191853	NA	0.0883397
64	wounded control	11		NA	1.28361e-05	7.33611e-06	8.64444e-06	1.10028e-05	1.61694e-05	1.2575e-05	1.25833e-06		NA	-1.8	-1.2	-1.35	-1.65	-1.4	-1.5	-1.2		NA	0.364862	0.371181	0.294416	0.354486	0.432308	0.466912	0.066353
64	wounded control	14		NA	1.18583e-05	8.37222e-06	NA	NA	NA	NA	NA		NA	-1.6	-1.5	NA	NA	NA	NA	NA		NA	0.33706	0.42358	NA	NA	NA	NA	NA
64	wounded control	15		NA	1.76028e-05	NA	1.59639e-05	4.50278e-06	7.01667e-06	NA	2.94722e-06		NA	-1.75	NA	-1.4	NA	NA	NA	NA		NA	0.500289	NA	0.543666	0.145065	0.187634	NA	0.155515
64	wounded control	16		NA	1.10028e-05	8.38333e-06	1.13972e-05	1.02167e-05	NA	NA	NA		NA	NA	-1.45	-1.45	-1.65	NA	NA	NA		NA	0.312739	0.424207	0.388094	0.329165	NA	NA	NA
64	wounded control	17		1.74833e-05	1.46861e-05	NA	NA	8.76944e-06	NA	NA	NA		NA	-1.65	NA	NA	-1.7	NA	NA	NA		0.534977	0.417397	NA	NA	0.282555	NA	NA	NA
64	wounded control	18		NA	2.02639e-05	NA	NA	NA	NA	NA	NA		NA	-1.6	NA	NA	NA	NA	NA	NA		NA	0.575914	NA	NA	NA	NA	NA	NA
64	wounded control	19		NA	4.73056e-06	NA	NA	NA	NA	NA	NA		NA	-1.8	NA	NA	NA	NA	NA	NA		NA	0.134445	NA	NA	NA	NA	NA	NA
64	wounded control	20		NA	NA	NA	NA	NA	NA	NA	1.2575e-05		NA	NA	NA	NA	NA	NA	NA	-0.9		NA	NA	NA	NA	NA	NA	NA	0.66353
64	wounded control	24		1.3025e-05	1.12833e-05	NA	NA	NA	NA	NA	NA		NA	NA	NA	NA	NA	NA	NA	NA		0.3986	0.320679	NA	NA	NA	NA	NA	NA
1510	wounded control	1		NA	8.98056e-06	NA	NA	NA	NA	NA	NA		NA	NA	NA	NA	NA	NA	NA	NA		NA	0.255253	NA	NA	NA	NA	NA	NA
1510	wounded control	3		1.43722e-05	1.31e-05	1.01306e-05	1.10028e-05	1.205e-05	2.02111e-05	NA	NA		NA	NA	-0.95	-1.1	-1.55	-1.2	NA	NA		0.439775	0.372308	0.512584	0.374711	0.388246	0.540385	NA	NA
1510	wounded control	12		NA	2.37167e-05	1.34861e-05	1.56944e-05	1.91833e-05	NA	2.04056e-05	1.33944e-05		NA	NA	-1.15	-1.2	-1.5	-1.35	-1.35	-0.9		NA	0.67412	0.682434	0.53451	0.618028	NA	0.757609	0.706718
1510	wounded control	14		NA	NA	NA	NA	NA	NA	NA	6.07778e-06		NA	NA	NA	NA	NA	NA	NA	-1.85		NA	NA	NA	NA	NA	NA	NA	0.320749
1510	wounded control	15		2.47472e-05	2.28556e-05	NA	1.48861e-05	NA	NA	NA	NA		-1.4	NA	NA	-0.9	NA	NA	NA	NA		0.757266	0.64964	NA	0.506966	NA	NA	NA	NA
1510	wounded control	16		NA	3.13917e-05	1.53472e-05	NA	NA	NA	NA	NA		NA	NA	-0.9	NA	NA	NA	NA	NA		NA	0.892218	0.776563	NA	NA	NA	NA	NA
1510	wounded control	17		NA	1.70917e-05	1.30222e-05	NA	NA	NA	NA	NA		NA	NA	-1.25	NA	NA	NA	NA	NA		NA	0.485763	0.658902	NA	NA	NA	NA	NA
1510	wounded control	18		NA	1.59806e-05	NA	NA	NA	NA	NA	NA		NA	NA	NA	NA	NA	NA	NA	NA		NA	0.454216	NA	NA	NA	NA	NA	NA
1510	wounded control	19		NA	1.59639e-05	NA	NA	1.965e-05	3.78944e-05	NA	NA		NA	NA	NA	NA	-1.5	-1.25	NA	NA		NA	0.453751	NA	NA	0.63301	1.01322	NA	NA
1510	wounded control	20		1.60833e-05	1.85611e-05	8.15833e-06	8.56667e-06	7.95556e-06	1.53861e-05	NA	8.32222e-06		NA	NA	-0.9	-1.5	-1.4	-1.35	-1.4	-1.4		0.492179	0.527544	0.412831	0.29173	0.256271	0.411366	NA	0.4391
64	intact control	22		NA	1.2575e-05	NA	1.17889e-05	NA	NA	NA	NA		NA	NA	NA	-1.3	NA	NA	NA	NA		NA	0.357416	NA	0.401476	NA	NA	NA	NA
64	intact control	23		NA	2.29889e-05	NA	NA	NA	NA	6.36611e-05	NA		NA	NA	NA	NA	NA	NA	-1.5	NA		NA	0.653401	NA	NA	NA	NA	2.36374	NA
1510	intact control	21		NA	1.46722e-05	NA	NA	1.44083e-05	NA	NA	NA		NA	NA	NA	NA	-1.65	NA	NA	NA		NA	0.416985	NA	NA	0.464208	NA	NA	NA
1510	intact control	23		NA	NA	NA	NA	1.86611e-05	3.28861e-05	2.24972e-05	1.42306e-05		NA	NA	NA	NA	NA	NA	-1.45	-0.85		NA	NA	NA	NA	0.601172	0.879324	0.835313	0.750888

## Sheet: xylem_sap
Compounds analyzed from the extracted xylem sap from E. polonica infected, wounded control and intact P. abies saplings. Table values are concentrations (mg ml -1).
week	clone / treatment	tree nr	malic acid	fructose	pinitol	quinic acid	d-Psicose	α-glucose	alkylphenol	inositol isomer	β-glucose	myo-inositol	sucrose	sum
	infected
3	64	1,3,12	0.055	0.31	0.424	0.049	0.089	0.117	0.007	0.02	0.201	0.025	0.635	1.931
5	64	4,8,21	0.093	0.347	0.735	0.067	0.089	0.144	0.054	0.043	0.239	0.062	2.005	3.878
6	64	2,10	0.025	0.413	0.483	0.056	0.099	0.199	0.018	0.012	0.332	0.034	1.073	2.743
13	64	5,9,13	0.111	1.655	0.176	0.041	0.408	0.509	0.091	0	0.873	0.01	0.47	4.344
3	1510	4,8,13	0.153	0.311	0.325	0.061	0.085	0.155	0.039	0.036	0.272	0.061	0.977	2.475
4	1510	2,10	0.133	0.553	0.339	0.055	0.168	0.211	0.196	0.039	0.359	0.039	0.476	2.569
6	1510	6,7	0.161	0.88	0.472	0.06	0.236	0.268	0.126	0.024	0.455	0.042	0.423	3.147
13	1510	5,9,11	0.243	2.571	0.417	0.103	0.775	1.031	0.134	0.011	1.78	0.026	1.284	8.374
	wounded controls
3	64	18,19,24	0.047	0.255	0.207	0.032	0.062	0.077	0.039	0.011	0.124	0.02	0.327	1.201
5	64	7,14,15	0.157	0.342	0.289	0.061	0.109	0.153	0.016	0.011	0.261	0.025	0.577	2.003
6	64	16,17	0.052	0.518	0.21	0.049	0.12	0.144	0.089	0.007	0.219	0.017	0.297	1.721
13	64	6,11,20	0.101	0.351	0.192	0.022	0.072	0.11	0.011	0.003	0.201	0.009	0.453	1.525
3	1510	1,16,18	0.163	2.495	0.19	0.034	0.763	0.791	0.009	0.008	1.326	0.023	0.151	5.953
4	1510	15,17	0.116	0.72	0.38	0.029	0.161	0.278	0.022	0.016	0.504	0.031	0.287	2.544
6	1510	3,19	0.166	1.91	0.808	0.037	0.533	0.405	0.012	0.025	0.733	0.032	0.169	4.831
13	1510	12,14,20	0.124	1.269	0.311	0.045	0.31	0.149	0.01	0.003	0.291	0.014	0.956	3.481

## Sheet: lesion_data
date	clone	treatment	tree_nr	xylem lesion length above inoculation, cm	xylem lesion length above inoculation, cm	xylem length depth(radial), cm	xylem lesion width (tangential), cm	xylem area specific lesion area, relative	bark lesion length (total), cm	bark lesion width, cm	diameter stem base (stem piece of lesion analysis), cm
				lesion measured to upper extreme end of lesion	lesion measured to the upper clear border end of the lesion
2016-06-29	64	cp	3	4.75	3.74	0.58	1.1	0.233106	11.8	1.9	1.32
2016-06-30	64	cp	1	4.4	3.8	0.51	0.98	0.12429	6.75	1.06	1.6
2016-07-01	64	cp	12	2.37	2.22	0.38	0.87	0.202294	6.2	1.7	1.02
2016-07-06	64	cp	4	3.3	3.13	0.5	1.14	0.185139	6.3	1.9	1.4
2016-07-08	64	cp	8	3.3	2.7	0.28	0.86	0.139046	5.5	1.6	1.05
2016-07-12	64	cp	21	NA	1.03	0.61	1	0.140927	3.2	1.5	1.66
2016-07-21	64	cp	2	3.15	1.38	0.5	0.97	0.308761	6.2	1.6	1
2016-07-21	64	cp	10	5.7	5.7	0.6	1.12	0.195311	10.7	1.7	1.48
2016-09-06	64	cp	5	0.98	0.42	0.47	0.84	0.23691	4.5	1.5	1.03
2016-09-06	64	cp	9	NA	3.07	0.43	1.08	0.174939	9.8	1.8	1.3
2016-09-08	64	cp	13	lesions extensive (tree dead)	lesions extensive (tree dead)	1.05	lesions extensive (tree dead)	lesions extensive (tree dead)	lesions extensive (tree dead)	lesions extensive (tree dead)
2016-07-06	1510	cp	13	4.07	3.4	0.38	1.02	0.157922	9.3	1.5	1.25
2016-07-07	1510	cp	4	4.8	2.66	0.6	1.05	0.248664	6.8	1.5	1.27
2016-07-08	1510	cp	8	4.4	3.25	0.45	1.12	0.154734	6.1	1.6	1.44
2016-07-13	1510	cp	10	NA	4.79	0.58	1	0.294355	12.16	1.2	1.12
2016-07-14	1510	cp	2	1.2	NA	0.58	0.97	0.358162	5.1	1.5	1
2016-07-26	1510	cp	6	NA	5.7	0.3	1.19	0.136574	10.2	1.8	1.29
2016-07-26	1510	cp	7	4.17	3.5	0.6	0.92	0.275209	11.5	1.4	1.13
2016-09-13	1510	cp	9	4.95	3.55	0.5	0.99	0.230204	10.4	1.9	1.17
2016-09-14	1510	cp	11	2.7	2.62	0.42	1.12	0.2012	6.85	1.9	1.22
2016-09-15	1510	cp	5	5.8	4.33	0.47	1.04	0.266786	12	1.7	1.08
2016-06-29	64	wc	19	0.32	NA	0.15	0.74	0.0418135	1.2	0.9	1.3
2016-06-30	64	wc	18	NA	0.1	0.14	0.56	0.0358453	1	1	1.18
2016-07-01	64	wc	24	1	1	0.13	0.66	0.042777	0.9	1	1.13
2016-07-06	64	wc	14	0.17	NA	0.15	0.67	0.0614959	1	0.9	1.02
2016-07-08	64	wc	7	NA	NA	0.1	NA	NA	1.1	1.05	1.048
2016-07-12	64	wc	15	NA	0.1	0.19	0.55	0.0821318	1	0.9	0.9
2016-07-21	64	wc	16	0.25	0.25	0.2	0.6	0.059828	1	0.9	1.13
2016-07-21	64	wc	17	0.2	0.2	1.5	1	NA	0.95	0.9	1.24
2016-09-06	64	wc	11	NA	0.15	0.18	0.72	0.0707355	1.2	0.9	1.08
2016-09-06	64	wc	20	NA	0.25	0.14	1	0.0710513	4.4	0.95	1.12
2016-09-08	64	wc	6	2.45	NA	0.2	0.85	0.0576618	1.1	1	1.37
2016-07-06	1510	wc	18	NA	0.16	0.1	0.69	0.0363031	1	1.5	1.1
2016-07-07	1510	wc	16	NA	0.05	0.15	0.7	0.0710438	1.05	0.94	0.97
2016-07-08	1510	wc	1	0.1	0.1	0.1	0.1	0.0287917	NA	NA	1.33
2016-07-13	1510	wc	17	NA	0.06	0.14	0.66	0.0565395	0.8	0.1	1.02
2016-07-14	1510	wc	15	NA	0.1	0.2	0.65	0.0750663	1.1	1.1	1.05
2016-07-26	1510	wc	3	NA	0.1	0.1	0.6	0.0265258	1	0.9	1.2
2016-07-26	1510	wc	19	NA	0.21	0.11	0.65	0.0504358	1.1	1	0.95
2016-09-13	1510	wc	14	1.22	NA	0.15	0.8	0.0280604	3.6	0.8	1.65
2016-09-14	1510	wc	20	0.5	NA	NA	NA	NA	1.1	0.9	1.15
2016-09-15	1510	wc	12	NA	NA	0.11	NA	NA	NA	NA	1.08
